# Supplementary material
Source: PubMed Central journal article supplement (PMC4126851)
Supplement: NIHMS603223-supplement-1.pdf [file NIHMS603223-supplement-1.pdf]

## Supplement for: Nanopore sequencing of the phi X 174 genome

Andrew H. Laszlo<sup>1</sup>, Ian M. Derrington<sup>1</sup>, Brian C. Ross<sup>1</sup>, Henry Brinkerhoff<sup>1</sup>, Andrew Adey<sup>2</sup>, Ian C. Nova<sup>1</sup>, Jonathan M. Craig<sup>1</sup>, Kyle W. Langford<sup>1</sup>, Jenny Mae Samson<sup>1</sup>, Riza Daza<sup>2</sup>, Kenji Doering<sup>1</sup>, Jay Shendure<sup>2</sup>, Jens H. Gundlach<sup>1,†</sup>

<sup>1</sup>Department of Physics, University of Washington, Seattle, WA 98195, USA

<sup>2</sup>Department of Genome Sciences, University of Washington, Seattle, WA 98195, USA

<sup>†</sup>Corresponding author. E-mail: [gundlach@uw.edu](mailto:gundlach@uw.edu)

### Table of Contents:

|                                                                                    |              |
|------------------------------------------------------------------------------------|--------------|
| <b>Data reduction flow chart (Sup. Fig. 1)</b>                                     | <b>2</b>     |
| <b>Current consensus for all de Bruijn strands (Sup. Figs. 2-4)</b>                | <b>3-5</b>   |
| <b>Description of automatic level finding algorithm</b>                            | <b>6-7</b>   |
| <b>Description of alignment algorithm (Sup. Fig. 5)</b>                            | <b>8</b>     |
| <b>Alignment of nanopore reads to quadromer prediction (Sup. Fig. 6)</b>           | <b>9</b>     |
| <b>Calculating alignment significance (Sup. Fig. 7)</b>                            | <b>10</b>    |
| <b>Coverage plot for phi X 174 amplicons (Sup. Fig. 8)</b>                         | <b>11</b>    |
| <b>Full phi X 174 library gel (Sup. Fig. 9)</b>                                    | <b>12</b>    |
| <b>Phi X 174 consensus and quadromer map revision (Sup. Figs. 10, 11)</b>          | <b>13-14</b> |
| <b>DNA scaffold reconstruction (Sup. Fig. 12)</b>                                  | <b>15</b>    |
| <b>Viral alignment and identification (Sup. Fig. 13)</b>                           | <b>16</b>    |
| <b>SNP calling workflow schematic (Sup. Fig. 14)</b>                               | <b>17</b>    |
| <b>SNP detection efficiencies and resequencing confusion matrix (Sup. Fig. 15)</b> | <b>18</b>    |
| <b>DNA strands used in this study (Sup. Table 1.1, 1.2)</b>                        | <b>19-20</b> |
| <b>Table of quadromer map values (Sup. Table 2.1-2.4)</b>                          | <b>21-24</b> |
| <b>References</b>                                                                  | <b>25</b>    |

## Supplementary Figure 1: Data reduction flow chart

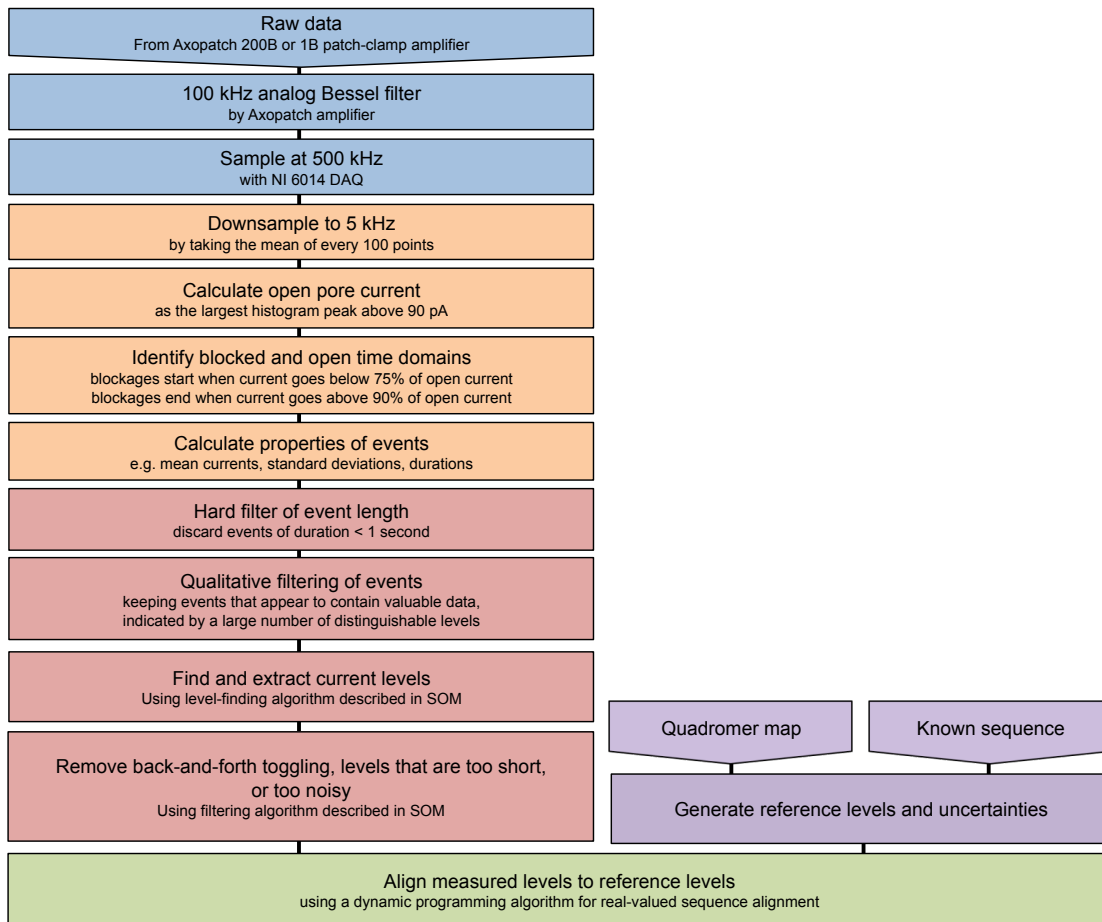



**Supplementary Figure 3: Current consensuses for all de Bruijn strands 4-6**

**de Bruijn Section 4**

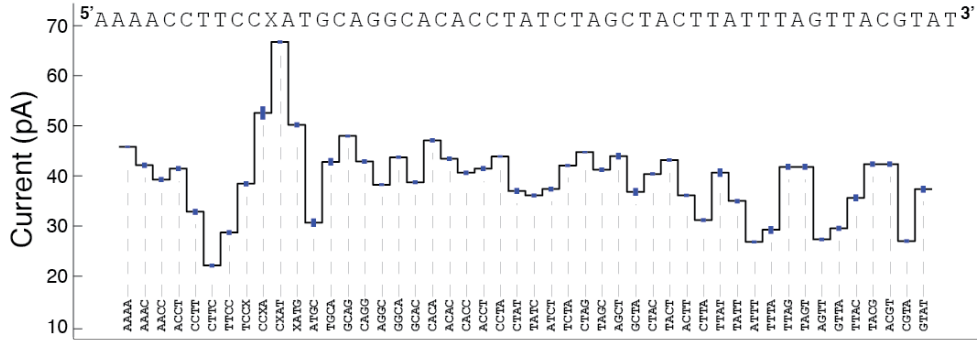

**de Bruijn Section 5**

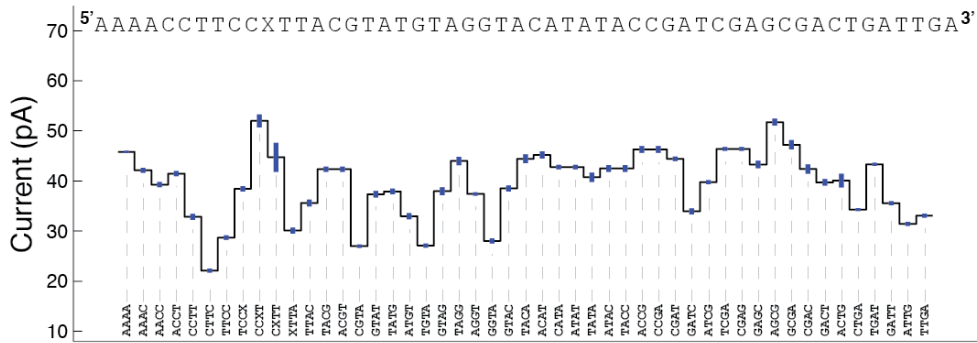

**de Bruijn Section 6**

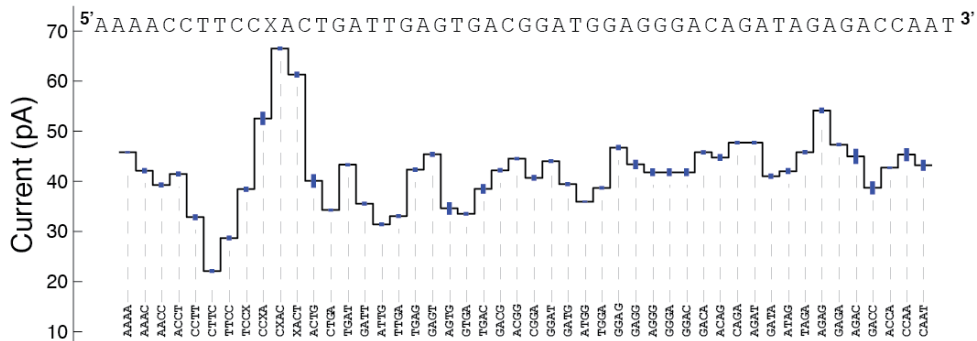

**Supplementary figure 3: de Bruijn segments 4-6:**Consensus current level sequences and associated quadromers for de Bruijn segments 4-6. Consensuses for each strand were generated from 12, 11, and 12 reads of strands 4,5, and 6, respectively.



### Description of automatic level finding algorithm

Our algorithm identifies levels in two steps. First, it identifies the level boundaries within the time-traces. Then it removes spurious levels and combines levels where the polymerase appears to have “toggled” between two bases.

**Identifying level locations.** Starting from the beginning of a current trace our technique first examines part of a current trace and divides it into two sections. Under the assumption that the sampled currents within each level are Gaussian-distributed, we compute the total probability that the two sections originated from two distinct Gaussian distributions. We divide this total probability by the probability of the null hypothesis, namely that the combination of the two sections originated from a single Gaussian. For ease of computation, we use log probabilities. For a given section the observed mean is  $\hat{I}$  and width is  $\sigma$ . For an individual current measurement within this section,  $I(t)$ , at time  $t$ , the log probability (density) is:

$$\log p(I(t)) = \log \left( \frac{1}{\sqrt{2\pi}\sigma} e^{-(I(t)-\hat{I})^2/2\sigma^2} \right) \quad \text{Eq. 1.}$$

To find the total log probability that the observations between  $t_1$  and  $t_2$  belong to a single level defined by  $\hat{I}$  and  $\sigma$ , we sum Eq. 1 between  $t_1$  and  $t_2$  and use the definition of sigma, giving

$$\log p(I([t_1, t_2])) = (t_2 - t_1) \log \sigma + \text{const} \quad \text{Eq. 2.}$$

We calculate total log probability (Eq. 2) for each of the two sections between  $t_1$  and  $t_2$ , and then between  $t_2$  and  $t_3$ . To compare the log probabilities, we subtract the total log probability of the null hypothesis by computing Eq. 2 between  $t_1$  and  $t_3$ . Combining all probabilities yields a comparison metric, which we denote  $\log p(t_1, t_2, t_3)$ ,

$$\begin{aligned} \log p(t_1, t_2, t_3) = & (t_2 - t_1) \log \sigma(t_2, t_1) + (t_3 - t_2) \log \sigma(t_3, t_2) \\ & - (t_3 - t_1) \log \sigma(t_3, t_1) + \text{const} \end{aligned} \quad \text{Eq. 3.}$$

The  $t_2$  yielding minimal  $\log p(t_1, t_2, t_3)$  indicates the location of a possible level transition within the current observations between  $t_1$  and  $t_3$ . In our level finding algorithm, we begin with a given time window ( $[t_1, t_3]$ ) and search for  $t_2$  that minimizes  $\log p$ . If  $\min(\log p)$  is less than a specified threshold (we used a threshold of  $\log p = -50$ ) there is a level transition at  $t_2$ , and we recursively search between  $t_1$  and  $t_2$  and between  $t_2$  and  $t_3$  for other level transitions. If  $\min(\log p)$  is above the threshold for the original time window then there are no transitions within  $t_1$  and  $t_3$  and we consider a larger window by increasing the value of  $t_3$ .

Not all levels correspond to the single nucleotide forward motion of the phi29 DNAP. We remove levels that (1) have durations  $< 500\mu\text{s}$ , (2) have mean values outside of expected ranges (10-70 pA) or (3) have an error in the mean greater than 5 pA. Finally, using the  $\log p$  calculated using Eq. 3 above, we identify regions of levels that are similar, and combine the levels in them.

## Description of alignment algorithm

Our tool for aligning level sequences is based on the well-known Needleman-Wunsch and Smith-Waterman algorithms for sequence alignment (1, 2). A Needleman-Wunsch or Smith-Waterman alignment of two base sequences A and B allows for gaps in both sequences. Due to possible gaps the optimal alignment between the first  $n_A$  bases of A and the first  $n_B$  bases of B is one of the following: 1) the optimal alignment between the first  $n_{A-1}$  bases of A and all  $n_B$  bases of B plus a gap in A; 2) the optimal alignment between all  $n_A$  bases of A and the first  $n_{B-1}$  bases of B plus a gap in B; or 3) the optimal alignment between the first  $n_{A-1}$  bases of A and the first  $n_{B-1}$  bases of B plus a final matched base in both sequences. Longer optimal alignments are recursively calculated from shorter optimal sub-alignments, and the entries in the alignment table (**sup. fig. 5a**) are filled from top-left to bottom-right.

The main complication in our experiment is that our level sequences sometimes step backwards. If we used the Needleman-Wunsch scheme directly each entry in the alignment table would depend on both the entry to the left (due to forward steps) and the entry to the right (due to backsteps), which in turn would depend on the entry in question. To fix this problem, we require each step in the alignment to advance sequence A forward by one, as shown in **Supplementary figure 5b**. Our alignment is therefore the optimal mapping of *every* level in sequence A to its corresponding level in sequence B (or a null level if no good match exists). Note that our alignment trace passes over rather than through skipped levels in sequence B (**Sup. fig. 5c**).

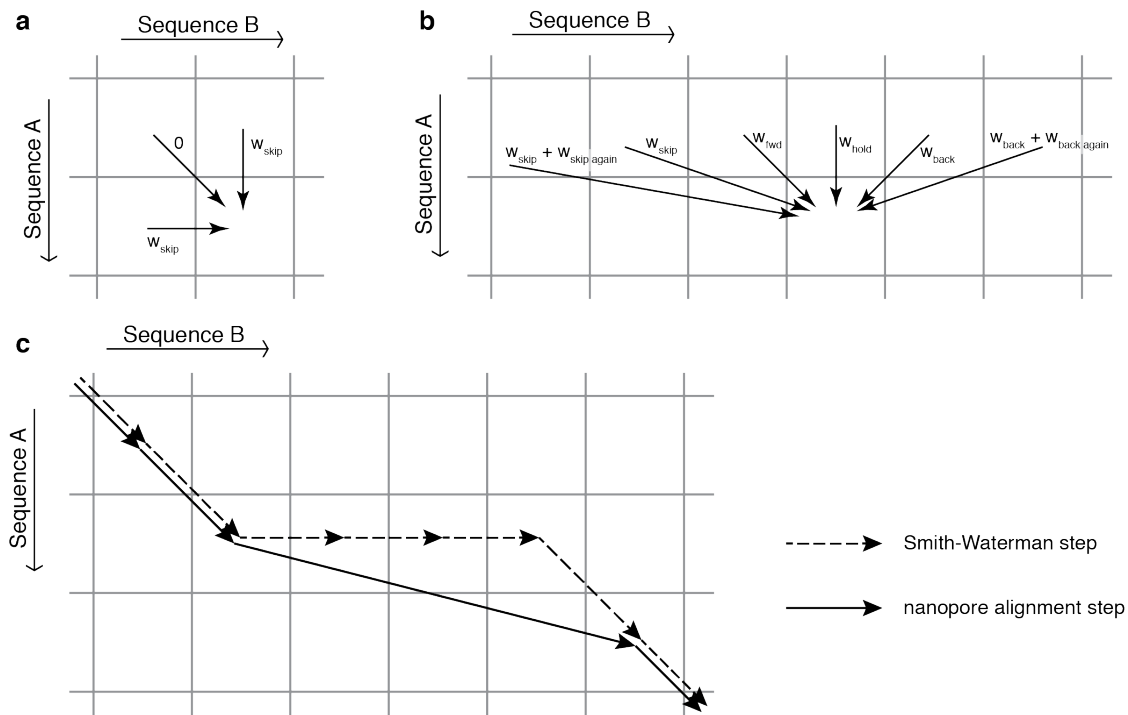

**Supplementary figure 5:** **a)** Needleman-Wunsch alignments consider horizontal and vertical steps in the alignment table (with a penalty  $w$ ), corresponding to mismatched bases in one sequence or the other. Diagonal steps, indicating a matched base, generally have no penalty unless there is a mismatch. **b)** Our nanopore alignment forces every step to progress along sequence A, but allows backsteps in sequence B. We assign affine penalties to skips and backsteps: for example, a backstep of 3 levels would earn the backstep penalty  $w_{\text{back}}$  plus twice the backstep-again penalty  $w_{\text{back again}}$ . **c)** The difference between a Needleman-Wunsch alignment and our nanopore alignment when there is a skip in sequence B.



### Supplementary figure 6: Alignment of nanopore reads to quadromer prediction:

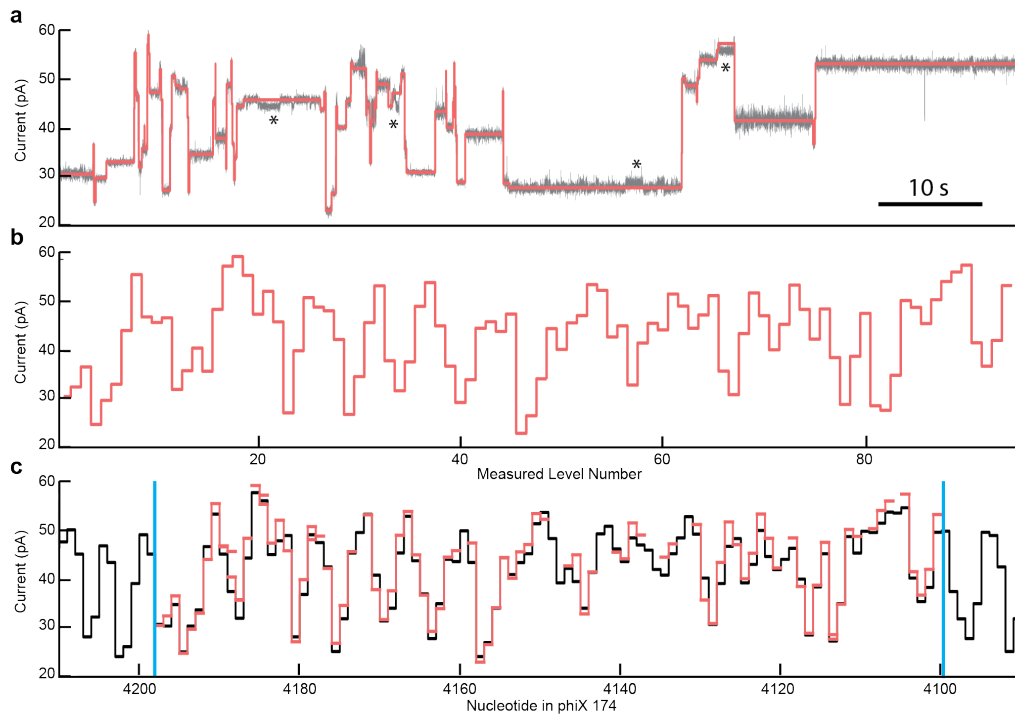

**Supplementary figure 6.** Similar to Fig. 3 in the main text, this figure demonstrates how alignment takes place. Instead of an amplicon being aligned, this figure shows a short sub-segment from a long event. **a)** Our level finding algorithm is used to identify transitions between levels in the current trace. Asterisks mark locations where the algorithm identifies and removes DNAP backsteps. **b)** We then extract the sequence of median current values from each level. **c)** Next, we align the current values to predicted values from the reference sequence using a dynamic programming alignment algorithm similar to Needleman-Wunch alignment (1). In some locations, levels are skipped in the nanopore read either due to motions of the DNAP or errors by the level finding algorithm. We determine read boundaries from the first and last matched levels in the reference sequence. Read boundaries are indicated by the blue lines.

## Calculating alignment significance

Using the afore mentioned alignment algorithm we align nanopore reads to the predicted level sequence from a known DNA sequence using the quadromer map. The alignment produces a raw score,  $s$ , that can be compared to alignments to other reference sequences. Next, we generate a large random sequence along with the expected current levels. We then perform alignments of our measured data to the random sequence. If our measured levels are truly from phi X 174 we expect the score to stand out from the distribution of scores to random alignments. **Supplementary figure 7** shows a histogram of the scores for random alignments (blue) and a marker (red) for the location of the score for the alignment to phi X 174. Strongly negative scores represent good alignments.

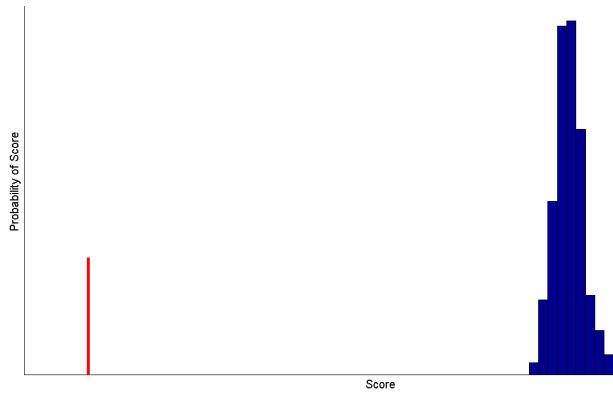

**Supplementary figure 7:** The probability distribution of scores for random alignments  $dP/dS$  (blue), together with a marker (red) showing the location of the score of the alignment to phi X 174. Units are in arbs. This plot is made using event number 49 from figure 4 of the main

The confidence in the alignment  $C$  is calculated by

$$C(S_0) = \int_{-\infty}^{S_0} \frac{dP}{dS} dS$$

$C$  represents the probability that a given alignment to a random sequence will produce a score better than  $S_0$ . This particular alignment had a confidence score of  $10^{-147}$ , reflecting a high probability of these measured levels belonging to phi X 174 relative to random alignments. We assume that in the limit of an infinite number of

random alignments, the distribution of alignment scores for random sequences approximate a Gaussian, so that

$$C(S_0) = \int_{-\infty}^{S_0} G(S) dS$$

We find the Gaussian by fitting to the width and center of the measured score distribution as floating parameters.

We comment briefly on the meaning of  $C$  because of the extreme smallness of these numbers.  $C$  represents nothing more than the probability that the produced alignment could also be randomly obtained. The score of  $10^{-147}$  was produced by an alignment of nanopore read of length  $\sim 2000$ .

### Supplementary figure 8: Coverage plot for phi X 174 amplicons

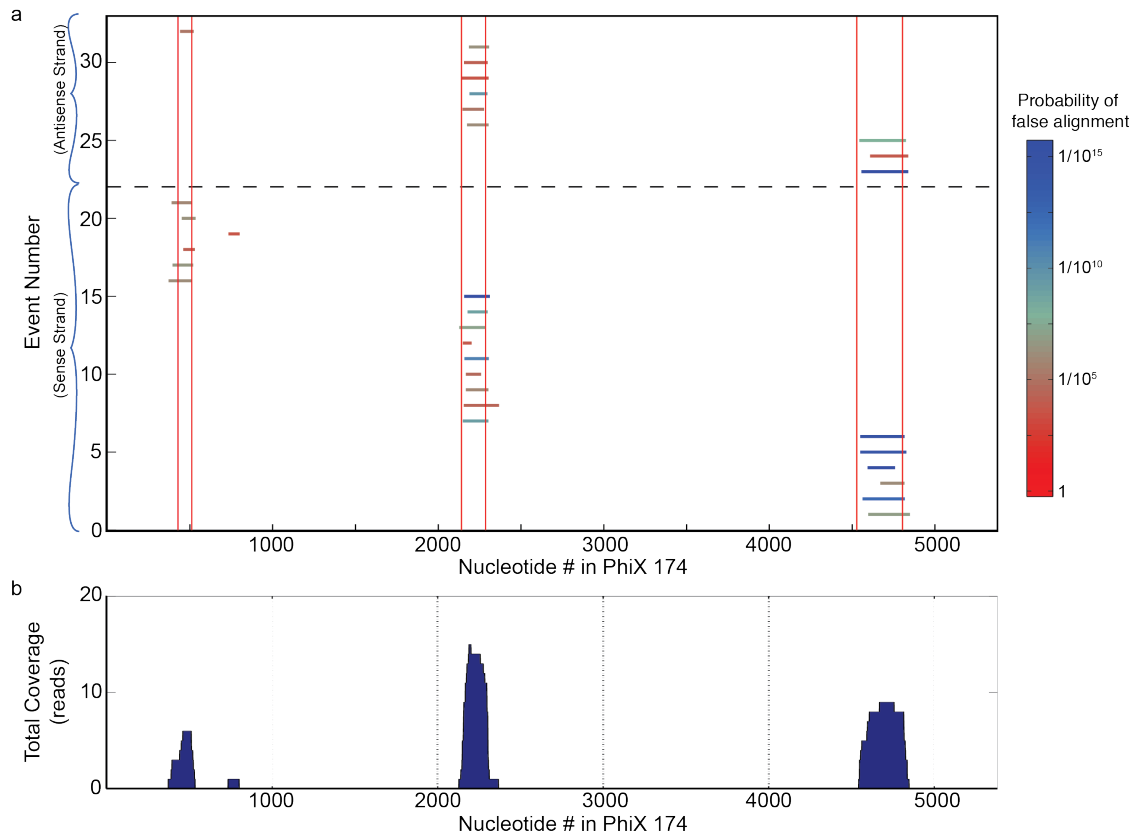

**Supplementary figure 8: Amplicon alignment.** 31 reads of phi X 174 amplicons aligned to current reference generated by translating the known phi X 174 sequence into current levels using the quadromer map. DNA strands are identified with high confidence, which enables a number of different useful applications such as organism identification and providing a reconstruction scaffold for short high-quality reads obtained with other sequencing technologies. **a)** Alignment bounds for 31 nanopore reads of phi X 174 amplicons. The alignment bounds match well with the actual amplicon locations. All reads with a quality better than  $1$  in  $10^4$  fall within one of three locations along the phi X 174 genome revealing the correct location of the amplicons within the genome. Because the adaptors attach to the strands in random orientation, we made reads of both the sense and anti-sense strands. **b)** Coverage for nanopore reads in **a)**.

### Supplementary figure 9: Full phi X 174 library gel

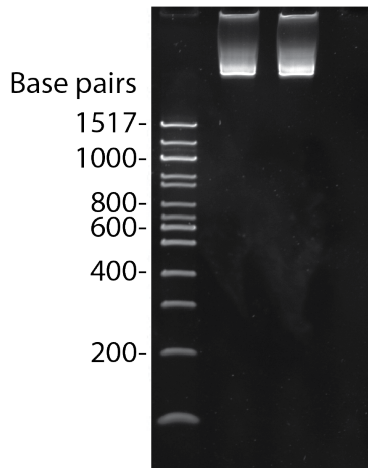

**Supplementary figure 9:** The gel shows the length distribution of phi X 174 genomic DNA used in our experiments (lanes 2 & 3 are replicates). There is a single band that contains broadening towards longer strand lengths. The band broadening is likely due to different numbers of ligated adaptors (0,1, or 2), different adaptor orientations (fan-tail or hairpin), or possibly circular forms of phi X 174. The absence of bands of shorter lengths indicates that our nanopore read lengths are determined not by library quality, but instead by how far the enzyme processes along the DNA before dissociating.

### Phi X 174 consensus and quadromer map revision

We used values from a current level consensus for the phi X 174 genome to update the quadromer map. To generate the consensus current level sequence for phi X 174, we aligned each nanopore read of the phi X 174 DNA to the predicted current level sequences for its sense and antisense base sequences. The predicted current level sequences were made from the initial measurements of quadromers in the de Bruijn sequence. Alignments with an overall confidence better than  $10^{-6}$  were selected to contribute to the updated map.

Only levels aligned with high certainty contributed to the consensus. All consensus level values were the average of at least four reads. Also, at least half of all reads covering this level contained a current level matched to that predicted level. The consensus value for the given context was calculated as the mean of all reads aligned to that level.

With the exception of the self complimentary quadromer GATC, there are many instances (35 on average, see **sup. fig. 10**) of each of the remaining 255 quadromers within the 5386-nucleotide phi X 174 genome and its complementary strand. For GATC, we retain the original de Bruijn sequence current value. Using the updated consensus levels, we were able to update the quadromer map with additional measurements in a variety of sequence contexts. The revised map uses the mean and standard deviation of all measurements made of each quadromer throughout the phi X 174 consensus (Table S2). **Supplementary figure 11** (next page) shows the revised quadromer map in comparison to the original quadromer map.

The consensus generation and quadromer map updating procedures were tested by reserving five high-quality reads to be excluded from the generation of the revised quadromer map, and then aligning these reads to both the consensus sequence and the updated prediction. In all cases, the confidence in the alignments of these reads improved dramatically when the new prediction was used as the reference sequence.

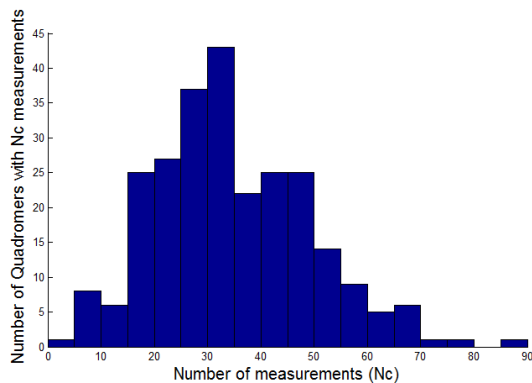

**Supplementary figure 10:** Histogram of the number of instances of each quadromer in the phi X genome. Each quadromer has 35 reads on average.

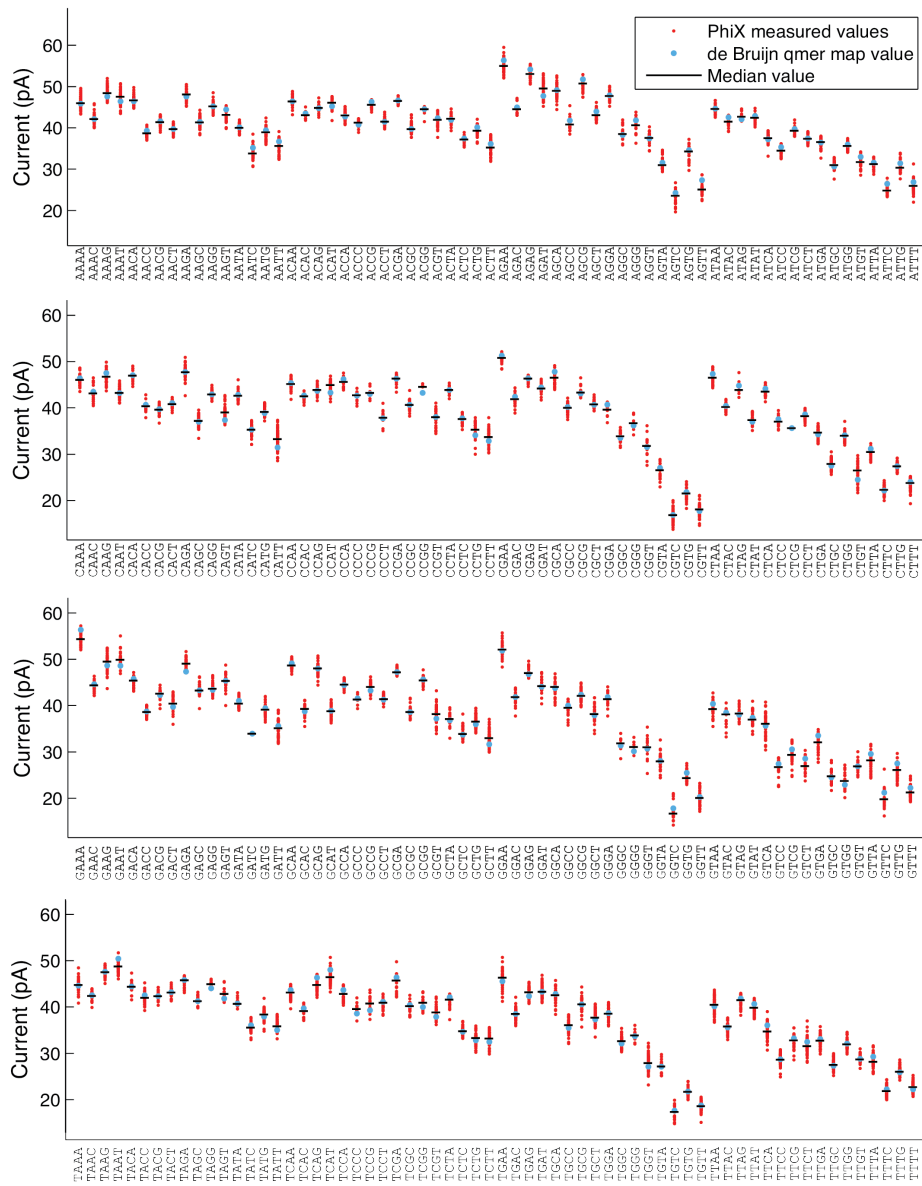

**Supplementary figure 11:** The revised quadromer map in alphabetical order, with 64 quadromers (written 5'-3') in each panel, beginning with A,C,G,T, respectively. Red dots are measured values of the quadromer in phi X 174. The blue dots are the values from the original de Bruijn quadromer map. The black lines are the medians of all measured instances of a given quadromer.

## DNA scaffold reconstruction:

The difficulty of *de novo* sequencing with most sequencing technologies is that their many short DNA reads must be stitched together in the proper order to form a long contiguous sequence. This assembly process is usually performed by looking for sequence similarity between overlapping reads. We demonstrate an alternative method of sequence scaffolding by mapping 100 short, 100 bp long reads from an Illumina MiSeq sequencer to one of our long (3466 levels) nanopore read. The mapping was performed by converting the sequence of each Illumina read, and its reverse complement, into a sequence of current levels using our quadromer map, and then using our level alignment tool to find the likely location of the current level sequence in our nanopore read. Figure S13 shows the fate of the 87 (out of 100) Illumina reads which generated an alignment to the nanopore read: 61 Illumina reads lay at least partially within the nanopore read and were aligned properly; 9 Illumina reads lay at least partially within the nanopore read and were misaligned; and 17 Illumina reads fell entirely outside the nanopore read. 9 of the 13 Illumina reads that did not generate an alignment actually lay outside the nanopore read.

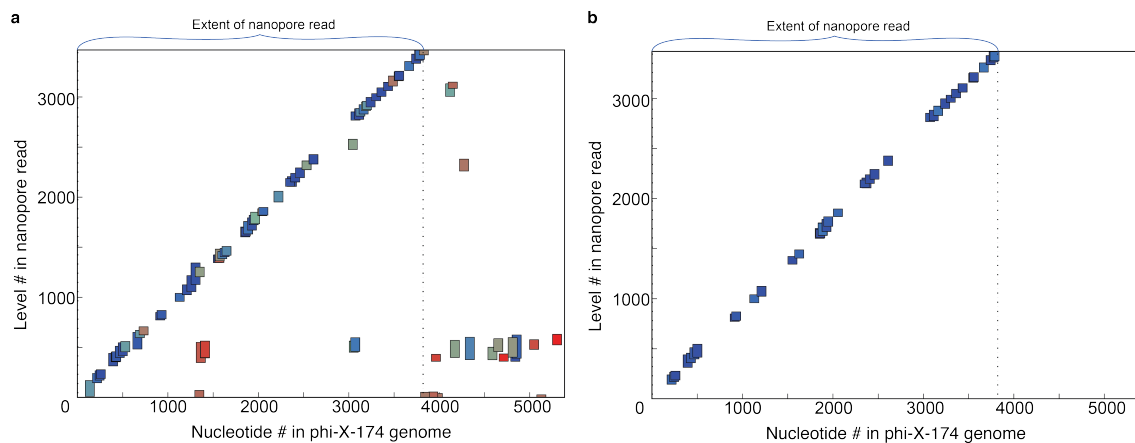

**Supplementary figure 12:** Alignment-scaffolded assembly of 87 short DNA sequences. Each short DNA sequence is indicated by a box, whose horizontal width indicates the location of the Illumina read within the phi X 174 genome and whose vertical height indicates the span of the Illumina read alignment to a 3466 level nanopore read (spanning 3819 bp in the phi X 174 genome). **a)** Location of all 87 reads that produced alignments to the nanopore read. Color indicates the alignment quality: blue is high-quality and red is low-quality. Overlapping rectangles represent contigs. **b)** After applying a cutoff filter on nanopore alignment quality and the length of the alignment to the nanopore read (keeping only alignments spanning less than 130 levels) we see that all erroneous alignments are filtered out (plus 23 low scoring but correct alignments). Of the 74 Illumina reads which should have aligned to our nanopore read, we are left with 38 (51%) Illumina reads properly localized within the phi X 174 genome with high confidence.

### Viral alignment and identification:

Viral identification was performed by aligning arbitrary 250 level subsets of nanopore reads of phi X 174 DNA to a viral database consisting of 5287 viruses (including phi X 174) totaling 156 megabases. To increase the alignment speed, first an 80-level subset of the nanopore read was aligned to every viral genome in the database. This initial alignment was used to generate a list of likely candidate alignments. Alignment confidences for each 80-level alignment to each virus were tallied and compared. Viruses with log confidences better than the mean log confidence score by 3 standard deviations were passed on to the next round; all others were discarded. In the next alignment round, 150 levels of the nanopore read were aligned to the remaining viruses followed by another round of database reduction. Finally all 250 levels were aligned to the remaining viruses. For each event tested, the 250-level alignment correctly identified the DNA as belonging to phi X 174 with at least 99.9996% confidence (in all instances, the 80 or 150-level alignment also suggested phi X 174 as the most likely although with reduced confidence).

Performing a final alignment of the entire >1000-level nanopore reads to the phi X 174 genome can confirm the conclusion to almost arbitrarily high confidence (less than 1 in  $10^{70}$  chance of mis-identification).

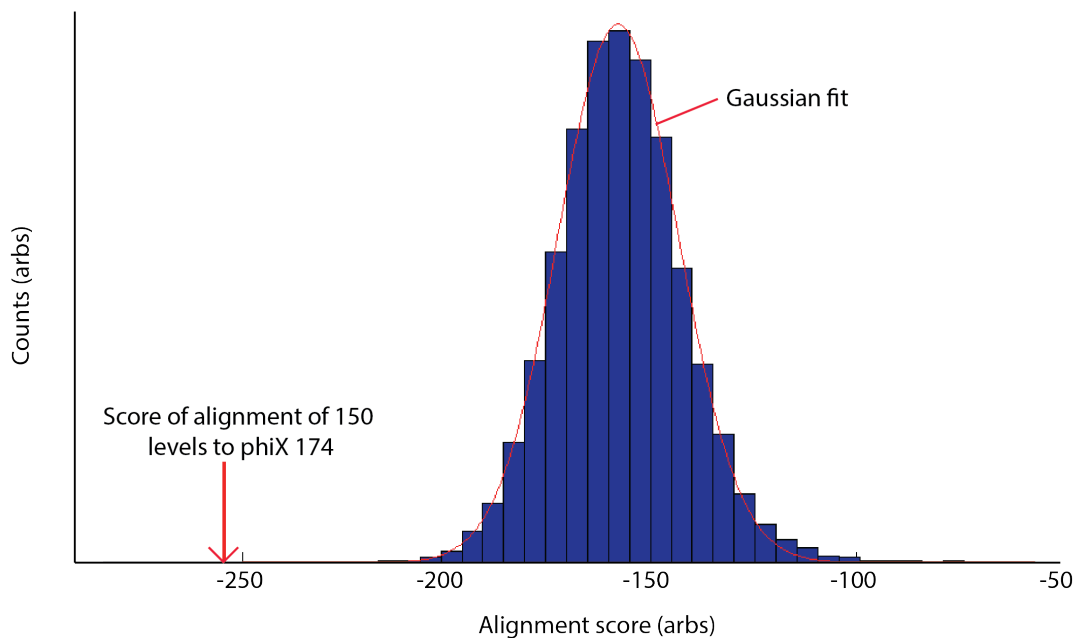

**Supplementary figure 13:** Distribution of alignment scores for a 150-level segment from a long nanopore read to a viral genome database. The distribution of scores is Gaussian. Here the 150-level alignment to phi X 174 differs from random alignments by  $\sim 6.5$  standard deviations, identifying the strand with 99.999997% confidence.



## SNP calling workflow schematic

1) We began with measured reference consensus made from several phi X 174 reads

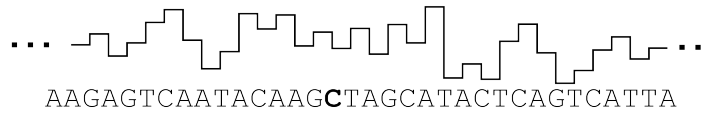

2) We inserted fake SNP's by altering sections of the reference consensus with quadromer map values for the SNP. In this illustration, a **C** is replaced with a **T**.

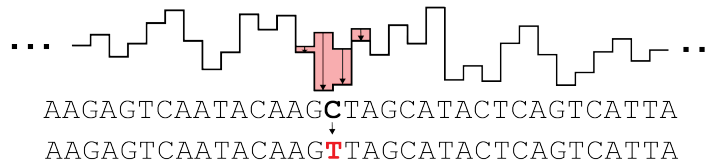

3) We then aligned several nanopore reads to the modified consensus. In general reads aligned quite well to the consensus, alignment errors may occur near inserted SNP's. We used alignments to identify the region of the nanopore reads that will be scrutinized for making the SNP call.

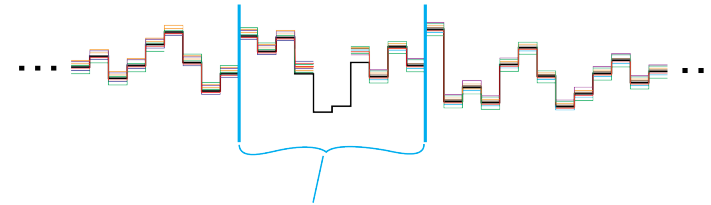

4) We extracted measured levels from **SNP-covering region** and generate a consensus using a local consensus generating algorithm which aligns multiple sequences to one another and generates a consensus.

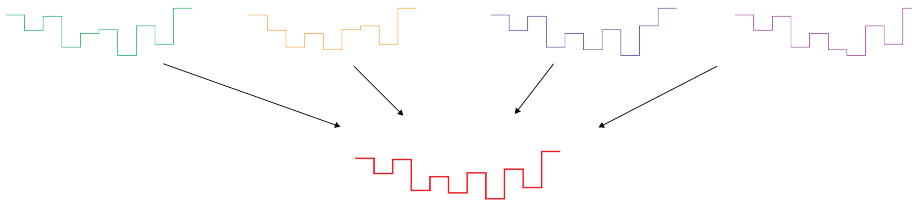

5) Finally we aligned the consensus to the two different SNP possibilities and made a call. Alignments to incorrect sequence resulted in errors (skips, backsteps, holds, bad levels) which decreased the quality of the alignment score. The DNA sequence that matched best with the consensus was called as the measured nucleotide. Including prior probabilities for allele frequency can be used to increase calling accuracy.

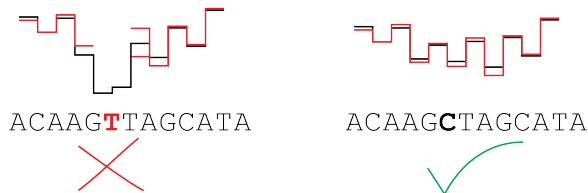

**Supplementary figure 14:** Schematic outline of SNP detection methods. We inserted “mock SNPs” into a reference consensus by inserting quadromer map values corresponding to the inserted SNP. Transversions and transitions were inserted into the genome in the following ratio (70% C $\leftrightarrow$ T/G $\leftrightarrow$ A, 15% C $\leftrightarrow$ A/G $\leftrightarrow$ T, 9% G $\leftrightarrow$ C, and 5% A $\leftrightarrow$ T) corresponding to how often they occur within the human genome (3). We then performed alignments of nanopore reads to the reference consensus as if we were comparing new nanopore reads to a previously measured consensus. We used these alignments to extract current levels from events that had reads of the SNP region in question. We then generate a consensus using these nanopore measurements. The sequence that aligns best with the consensus is selected as the measured allele. See **Sup. Fig. 16** for detection efficiencies.

## SNP detection efficiencies and resequencing confusion matrix

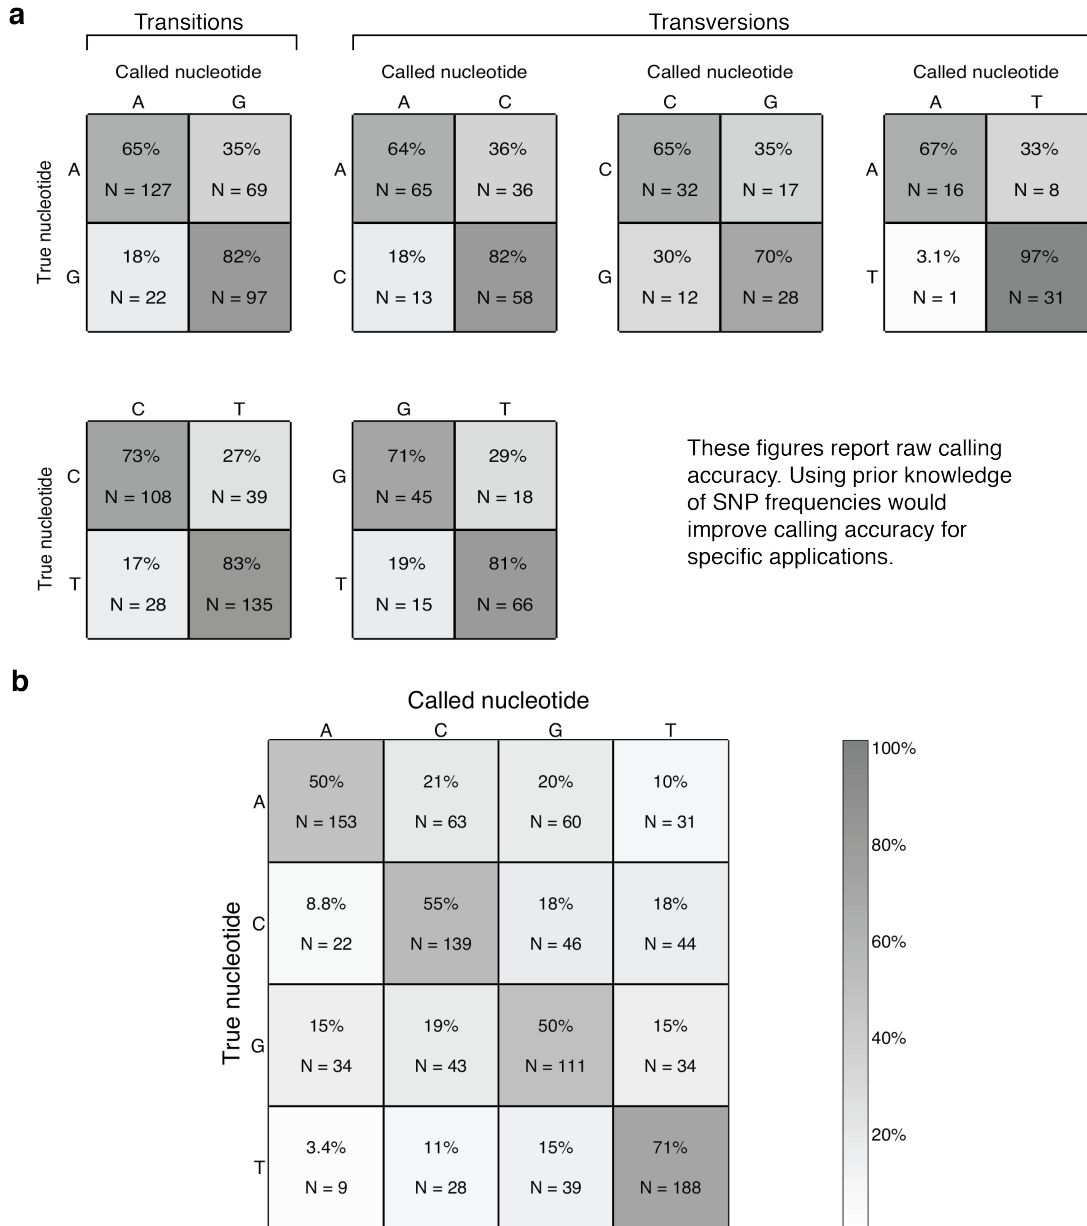

**Supplementary figure 15: Confusion matrices for SNPs and reference sequencing.** **a)** Detection efficiencies for each possible SNP in each box. The actual DNA nucleotide is displayed along the left of each box while the nanopore call is displayed along the top of each box. The contrast within the box indicates our ability to distinguish between the two nucleotides in various sequence contexts. **b)** shows detection efficiency for reference sequencing where instead of comparing only two nucleotides (as one does when interrogating most SNPs), we select the nucleotide that matches the data best out of all four nucleotides. Combining reads of both sense and anti-sense strands can increase calling accuracy.





**Supplementary Table 2.1: Table of quadromer map values beginning with A.**

| Quadromer | de Bruijn Value (pÅ) | Revised Value (pÅ) | Error on Revised Value (pÅ) | Number of Phi X 174 Measurements |
|-----------|----------------------|--------------------|-----------------------------|----------------------------------|
| AAAA      | 45.8                 | 46.2               | 1.4                         | 65                               |
| AAAC      | 42.1                 | 42.1               | 1.3                         | 45                               |
| AAAG      | 47.5                 | 48.5               | 1.4                         | 34                               |
| AAAT      | 46.4                 | 47.3               | 1.7                         | 52                               |
| AACA      | 46.4                 | 46.8               | 1.1                         | 27                               |
| AACC      | 39.3                 | 38.7               | 0.8                         | 45                               |
| AACG      | 41.6                 | 41.4               | 0.9                         | 42                               |
| AACT      | 39.7                 | 39.7               | 1.0                         | 57                               |
| AAGA      | 47.5                 | 48.0               | 1.2                         | 42                               |
| AAGC      | 41.5                 | 41.4               | 1.2                         | 25                               |
| AAGG      | 45.2                 | 45.2               | 1.2                         | 25                               |
| AAGT      | 44.4                 | 43.0               | 1.6                         | 36                               |
| AATA      | 40.2                 | 40.1               | 0.9                         | 44                               |
| AATC      | 35.2                 | 34.1               | 1.5                         | 34                               |
| AATG      | 39.4                 | 38.7               | 1.4                         | 29                               |
| AATT      | 36.7                 | 35.4               | 1.8                         | 54                               |
| ACAA      | 46.4                 | 46.4               | 1.3                         | 34                               |
| ACAC      | 43.4                 | 43.1               | 0.8                         | 15                               |
| ACAG      | 44.7                 | 44.8               | 1.0                         | 23                               |
| ACAT      | 45.2                 | 45.9               | 1.4                         | 16                               |
| ACCA      | 42.7                 | 43.0               | 1.0                         | 50                               |
| ACCC      | 40.7                 | 41.0               | 0.9                         | 14                               |
| ACCG      | 46.3                 | 45.4               | 0.7                         | 40                               |
| ACCT      | 41.5                 | 41.5               | 1.0                         | 34                               |
| ACGA      | 46.6                 | 46.5               | 0.6                         | 48                               |
| ACGC      | 39.7                 | 39.9               | 1.3                         | 31                               |
| ACGG      | 44.5                 | 44.4               | 0.8                         | 26                               |
| ACGT      | 42.3                 | 41.6               | 1.5                         | 30                               |
| ACTA      | 41.9                 | 42.1               | 1.3                         | 43                               |
| ACTC      | 37.4                 | 37.1               | 0.8                         | 41                               |
| ACTG      | 40.1                 | 39.3               | 1.4                         | 42                               |
| ACIT      | 36.1                 | 35.3               | 1.7                         | 48                               |
| AGAA      | 56.3                 | 55.1               | 1.6                         | 43                               |
| AGAC      | 45.0                 | 44.6               | 1.2                         | 36                               |
| AGAG      | 54.1                 | 53.0               | 1.3                         | 29                               |
| AGAT      | 47.7                 | 49.3               | 2.2                         | 19                               |
| AGCA      | 49.1                 | 48.9               | 1.5                         | 26                               |
| AGCC      | 41.8                 | 41.0               | 1.4                         | 26                               |
| AGCG      | 51.7                 | 50.4               | 1.4                         | 26                               |
| AGCT      | 44.0                 | 43.1               | 1.1                         | 20                               |
| AGGA      | 47.9                 | 47.7               | 1.1                         | 26                               |
| AGGC      | 38.3                 | 38.8               | 1.4                         | 13                               |
| AGGG      | 41.8                 | 40.6               | 2.0                         | 11                               |
| AGGT      | 37.4                 | 37.6               | 1.3                         | 39                               |
| AGTA      | 31.5                 | 31.4               | 1.4                         | 53                               |
| AGTC      | 24.3                 | 23.3               | 1.8                         | 50                               |
| AGTG      | 34.6                 | 33.8               | 1.9                         | 30                               |
| AGTT      | 27.3                 | 25.2               | 1.4                         | 60                               |
| ATAA      | 44.6                 | 44.5               | 0.9                         | 37                               |
| ATAC      | 42.5                 | 41.5               | 1.0                         | 33                               |
| ATAG      | 42.0                 | 42.8               | 0.8                         | 41                               |
| ATAT      | 42.8                 | 42.3               | 0.9                         | 16                               |
| ATCA      | 37.2                 | 37.5               | 1.1                         | 20                               |
| ATCC      | 35.3                 | 34.4               | 1.1                         | 17                               |
| ATCG      | 39.8                 | 39.3               | 1.0                         | 28                               |
| ATCT      | 37.4                 | 37.3               | 0.9                         | 26                               |
| ATGA      | 36.4                 | 36.4               | 1.1                         | 25                               |
| ATGC      | 30.7                 | 31.0               | 1.0                         | 25                               |
| ATGG      | 36.0                 | 35.6               | 0.8                         | 29                               |
| ATGT      | 33.0                 | 31.7               | 1.4                         | 14                               |
| ATTA      | 31.6                 | 31.1               | 0.9                         | 46                               |
| ATTC      | 26.4                 | 25.0               | 1.0                         | 33                               |
| ATTG      | 31.4                 | 30.6               | 1.2                         | 39                               |

Supplementary Table 2.2: Table of quadromer map values beginning with C.

| Quadromer | de Bruijn Value(pÅ) | Revised Value(pÅ) | Error on Revised Value (pÅ) | Number of Phi X 174 Measurements |
|-----------|---------------------|-------------------|-----------------------------|----------------------------------|
| CAAA      | 46.4                | 46.1              | 1.1                         | 36                               |
| CAAC      | 43.5                | 43.1              | 1.4                         | 41                               |
| CAAG      | 47.5                | 46.7              | 1.3                         | 30                               |
| CAAT      | 43.2                | 43.3              | 1.2                         | 31                               |
| CACA      | 47.1                | 46.9              | 1.3                         | 15                               |
| CACC      | 40.6                | 40.3              | 1.1                         | 20                               |
| CACG      | 39.7                | 39.4              | 1.0                         | 18                               |
| CACT      | 41.1                | 40.8              | 0.8                         | 20                               |
| CAGA      | 47.7                | 47.8              | 1.5                         | 22                               |
| CAGC      | 37.0                | 37.1              | 1.2                         | 31                               |
| CAGG      | 42.9                | 43.0              | 0.8                         | 18                               |
| CAGT      | 37.4                | 39.1              | 1.7                         | 51                               |
| CATA      | 42.8                | 42.6              | 1.0                         | 31                               |
| CATC      | 35.3                | 35.1              | 1.3                         | 25                               |
| CATG      | 38.9                | 39.4              | 1.0                         | 18                               |
| CATT      | 31.4                | 33.1              | 2.0                         | 34                               |
| CCAA      | 45.3                | 45.1              | 1.0                         | 34                               |
| CCAC      | 42.7                | 42.3              | 0.7                         | 15                               |
| CCAG      | 43.7                | 44.0              | 1.1                         | 29                               |
| CCAT      | 43.3                | 44.5              | 1.3                         | 36                               |
| CCGA      | 46.3                | 45.5              | 1.1                         | 15                               |
| CCCC      | 42.6                | 42.4              | 1.2                         | 10                               |
| CCCG      | 43.0                | 43.3              | 1.2                         | 7                                |
| CCCT      | 37.8                | 38.0              | 1.4                         | 19                               |
| CCGA      | 46.3                | 46.2              | 0.9                         | 28                               |
| CCGC      | 40.7                | 40.7              | 1.1                         | 40                               |
| CCGG      | 43.2                | 44.2              | 0.8                         | 19                               |
| CCGT      | 38.0                | 37.9              | 1.9                         | 33                               |
| CCTA      | 43.9                | 43.8              | 0.9                         | 26                               |
| CCTC      | 37.8                | 37.4              | 0.9                         | 27                               |
| CCTG      | 34.1                | 35.2              | 1.7                         | 18                               |
| CCTT      | 32.8                | 33.6              | 1.7                         | 38                               |
| CGAA      | 51.3                | 50.6              | 0.9                         | 58                               |
| CGAC      | 42.4                | 41.8              | 1.2                         | 44                               |
| CGAG      | 46.4                | 46.1              | 0.7                         | 32                               |
| CGAT      | 44.4                | 44.1              | 1.1                         | 19                               |
| CGCA      | 47.8                | 46.4              | 1.4                         | 45                               |
| CGCC      | 40.2                | 39.9              | 1.0                         | 31                               |
| CGCG      | 43.1                | 43.5              | 0.9                         | 26                               |
| CGCT      | 40.7                | 40.9              | 0.8                         | 30                               |
| CGGA      | 40.7                | 39.6              | 1.3                         | 28                               |
| CGGC      | 33.5                | 33.8              | 1.0                         | 25                               |
| CGGG      | 36.2                | 36.7              | 1.8                         | 9                                |
| CGGT      | 31.6                | 31.8              | 2.0                         | 43                               |
| CGTA      | 27.0                | 26.2              | 1.5                         | 41                               |
| CGTC      | 16.8                | 16.6              | 1.6                         | 49                               |
| CGTG      | 21.8                | 21.4              | 1.4                         | 19                               |
| CGTT      | 17.7                | 17.9              | 1.3                         | 58                               |
| CTAA      | 47.3                | 46.5              | 1.3                         | 48                               |
| CTAC      | 40.4                | 40.1              | 0.9                         | 34                               |
| CTAG      | 44.8                | 44.4              | 1.8                         | 1                                |
| CTAT      | 37.0                | 37.5              | 1.1                         | 40                               |
| CTCA      | 44.1                | 43.6              | 0.9                         | 30                               |
| CTCC      | 37.5                | 37.2              | 1.0                         | 27                               |
| CTCG      | 35.7                | 35.7              | 2.3                         | 32                               |
| CTCT      | 38.6                | 38.2              | 0.9                         | 34                               |
| CTGA      | 34.3                | 34.5              | 1.1                         | 24                               |
| CTGC      | 27.5                | 27.9              | 1.0                         | 38                               |
| CTGG      | 34.1                | 33.8              | 1.0                         | 23                               |
| CTGT      | 24.5                | 26.1              | 2.1                         | 22                               |
| CTTA      | 31.2                | 30.3              | 1.0                         | 36                               |
| CTTC      | 22.1                | 22.3              | 0.9                         | 52                               |
| CTTG      | 27.4                | 27.3              | 0.8                         | 33                               |
| CTTT      | 24.0                | 23.6              | 1.1                         | 66                               |

**Supplementary Table 2.3: Table of quadromer map values beginning with G.**

| Quadromer | de Bruijn Value(pÅ) | Revised Value(pÅ) | Error on Revised Value (pÅ) | Number of Phi X 174 Measurements |
|-----------|---------------------|-------------------|-----------------------------|----------------------------------|
| GAAA      | 56.3                | 54.3              | 1.3                         | 50                               |
| GAAC      | 44.6                | 44.1              | 1.1                         | 44                               |
| GAAG      | 48.7                | 49.3              | 1.9                         | 38                               |
| GAAT      | 48.6                | 50.0              | 1.6                         | 31                               |
| GACA      | 45.8                | 45.1              | 1.2                         | 24                               |
| GACC      | 38.7                | 38.6              | 0.9                         | 30                               |
| GACG      | 42.2                | 42.4              | 0.9                         | 38                               |
| GA CT     | 39.7                | 40.4              | 1.5                         | 49                               |
| GAGA      | 47.4                | 49.1              | 1.2                         | 23                               |
| GAGC      | 43.3                | 43.4              | 1.2                         | 21                               |
| GAGG      | 43.4                | 43.8              | 1.3                         | 16                               |
| GAGT      | 45.4                | 45.2              | 1.8                         | 49                               |
| GATA      | 41.0                | 40.5              | 0.9                         | 16                               |
| GATC      | 33.9                | 33.9              | 2.3                         | 6                                |
| GATG      | 39.4                | 39.2              | 1.3                         | 18                               |
| GATT      | 35.6                | 35.1              | 1.9                         | 24                               |
| GCAA      | 49.1                | 48.8              | 0.8                         | 41                               |
| GCAC      | 38.7                | 39.1              | 1.5                         | 22                               |
| GCAG      | 48.0                | 47.8              | 1.4                         | 35                               |
| GCA T     | 38.9                | 38.8              | 1.3                         | 21                               |
| GCCA      | 44.4                | 44.7              | 0.7                         | 22                               |
| GCCC      | 41.5                | 41.2              | 1.4                         | 8                                |
| GCCG      | 43.2                | 43.9              | 1.0                         | 41                               |
| GCCT      | 41.3                | 41.5              | 0.8                         | 21                               |
| GCGA      | 47.2                | 47.3              | 0.6                         | 23                               |
| GCGC      | 38.6                | 38.8              | 1.2                         | 22                               |
| GCGG      | 45.6                | 45.5              | 1.0                         | 29                               |
| GCGT      | 37.2                | 38.1              | 1.9                         | 35                               |
| GCTA      | 36.8                | 37.1              | 1.3                         | 21                               |
| GCTC      | 33.7                | 34.2              | 1.4                         | 20                               |
| GCTG      | 36.0                | 36.6              | 1.3                         | 26                               |
| GCTT      | 31.6                | 32.9              | 1.6                         | 33                               |
| GGAA      | 51.8                | 52.2              | 1.6                         | 32                               |
| GGAC      | 41.8                | 41.5              | 1.6                         | 26                               |
| GGAG      | 46.7                | 47.4              | 1.2                         | 27                               |
| GGAT      | 44.1                | 44.3              | 1.5                         | 11                               |
| GGCA      | 43.7                | 43.6              | 1.7                         | 18                               |
| GGCC      | 40.0                | 39.3              | 1.6                         | 8                                |
| GGCG      | 42.3                | 42.2              | 1.5                         | 22                               |
| GGCT      | 37.9                | 38.3              | 1.8                         | 17                               |
| GGGA      | 41.8                | 41.3              | 1.8                         | 14                               |
| GGGC      | 31.3                | 31.7              | 1.5                         | 6                                |
| GGGG      | 30.2                | 31.1              | 4.6                         | 7                                |
| GGGT      | 30.7                | 30.9              | 2.4                         | 15                               |
| GGTA      | 28.0                | 27.8              | 1.8                         | 44                               |
| GGTC      | 17.8                | 17.1              | 1.8                         | 40                               |
| GGTG      | 25.5                | 24.7              | 1.3                         | 24                               |
| GGTT      | 20.3                | 19.9              | 1.6                         | 54                               |
| GTAA      | 40.3                | 39.3              | 1.7                         | 47                               |
| GTAC      | 38.5                | 37.5              | 1.9                         | 31                               |
| GTAG      | 38.0                | 38.3              | 1.4                         | 42                               |
| GTAT      | 37.4                | 37.2              | 1.7                         | 44                               |
| GTCA      | 35.7                | 35.9              | 2.4                         | 34                               |
| GTCC      | 27.4                | 26.3              | 2.1                         | 31                               |
| GTCG      | 30.6                | 29.2              | 2.0                         | 58                               |
| GTCI      | 28.5                | 27.1              | 1.7                         | 46                               |
| GTGA      | 33.5                | 31.7              | 2.0                         | 23                               |
| GTGC      | 24.4                | 24.9              | 1.8                         | 24                               |
| GTGG      | 22.9                | 24.0              | 1.9                         | 25                               |
| GTGT      | 26.9                | 26.9              | 1.4                         | 21                               |
| GTTA      | 25.5                | 27.8              | 1.9                         | 49                               |
| GTTC      | 21.2                | 20.1              | 1.8                         | 47                               |
| GTTG      | 27.5                | 25.9              | 1.6                         | 45                               |
| GTTT      | 22.2                | 21.4              | 1.2                         | 65                               |

**Supplementary Table 2.4: Table of quadromer map values beginning with T.**

| Quadromer | de Bruijn Value(pÅ) | Revised Value (pÅ) | Error on Revised Value (pÅ) | Number of Phi X 174 Measurements |
|-----------|---------------------|--------------------|-----------------------------|----------------------------------|
| TAAA      | 44.6                | 44.7               | 1.2                         | 56                               |
| TAAC      | 42.5                | 42.4               | 0.9                         | 39                               |
| TAAG      | 47.6                | 47.5               | 1.0                         | 28                               |
| TAAT      | 50.5                | 48.7               | 1.2                         | 48                               |
| TACA      | 44.4                | 44.3               | 1.4                         | 24                               |
| TACC      | 42.5                | 42.0               | 1.2                         | 41                               |
| TACG      | 42.3                | 42.5               | 1.0                         | 37                               |
| TACT      | 43.2                | 43.2               | 0.8                         | 47                               |
| TAGA      | 45.8                | 45.3               | 1.1                         | 32                               |
| TAGC      | 41.3                | 41.4               | 1.0                         | 20                               |
| TAGG      | 44.0                | 44.8               | 0.7                         | 29                               |
| TAGT      | 41.8                | 42.9               | 1.3                         | 56                               |
| TATA      | 40.7                | 40.9               | 0.9                         | 34                               |
| TATC      | 36.1                | 35.5               | 1.0                         | 26                               |
| TATG      | 37.9                | 38.3               | 1.2                         | 31                               |
| TATT      | 35.0                | 36.0               | 1.1                         | 61                               |
| TCAA      | 43.7                | 43.0               | 1.1                         | 30                               |
| TCAC      | 39.7                | 39.0               | 1.1                         | 23                               |
| TCAG      | 46.3                | 44.8               | 1.3                         | 35                               |
| TCAT      | 48.1                | 46.5               | 1.4                         | 36                               |
| TCCA      | 43.7                | 42.6               | 1.3                         | 28                               |
| TCCC      | 38.6                | 39.5               | 1.1                         | 18                               |
| TCCG      | 39.3                | 40.8               | 1.6                         | 32                               |
| TCCT      | 41.2                | 40.7               | 1.0                         | 35                               |
| TCGA      | 46.4                | 45.2               | 2.0                         | 42                               |
| TCGC      | 40.4                | 40.0               | 1.2                         | 37                               |
| TCGG      | 40.0                | 41.0               | 1.5                         | 30                               |
| TCGT      | 37.9                | 38.9               | 1.4                         | 71                               |
| TCTA      | 42.1                | 41.3               | 1.2                         | 33                               |
| TCTC      | 34.6                | 34.8               | 0.9                         | 34                               |
| TCTG      | 32.8                | 33.1               | 1.3                         | 23                               |
| TCTT      | 32.4                | 33.1               | 1.4                         | 68                               |
| TGAA      | 45.6                | 46.0               | 2.1                         | 31                               |
| TGAC      | 38.5                | 38.6               | 1.1                         | 32                               |
| TGAG      | 42.4                | 43.1               | 1.2                         | 24                               |
| TGAT      | 43.3                | 43.3               | 1.3                         | 16                               |
| TGCA      | 42.8                | 42.4               | 1.7                         | 28                               |
| TGCC      | 35.4                | 35.9               | 1.6                         | 27                               |
| TGCG      | 40.6                | 40.4               | 1.7                         | 43                               |
| TGCT      | 37.3                | 37.9               | 1.3                         | 34                               |
| TGGA      | 38.7                | 38.6               | 1.3                         | 27                               |
| TGGC      | 32.1                | 32.5               | 1.1                         | 21                               |
| TGGG      | 33.7                | 33.8               | 1.0                         | 14                               |
| TGGT      | 27.1                | 28.0               | 1.7                         | 64                               |
| TGTA      | 27.1                | 27.0               | 1.6                         | 27                               |
| TGTC      | 17.6                | 17.1               | 1.4                         | 32                               |
| TGTG      | 21.7                | 21.7               | 1.1                         | 19                               |
| TGTT      | 18.8                | 18.6               | 1.0                         | 35                               |
| TTAA      | 40.1                | 40.4               | 1.6                         | 39                               |
| TTAC      | 35.6                | 35.6               | 1.2                         | 53                               |
| TTAG      | 41.8                | 41.2               | 1.3                         | 53                               |
| TTAT      | 40.6                | 39.8               | 1.1                         | 51                               |
| TTCA      | 36.0                | 34.8               | 1.6                         | 40                               |
| TTCC      | 28.7                | 28.6               | 1.3                         | 39                               |
| TTCG      | 33.2                | 32.5               | 1.6                         | 62                               |
| TTCT      | 32.4                | 31.6               | 1.6                         | 46                               |
| TTGA      | 33.1                | 32.8               | 1.2                         | 30                               |
| TTGC      | 27.3                | 27.6               | 1.0                         | 45                               |
| TTGG      | 32.1                | 32.0               | 1.0                         | 46                               |
| TTGT      | 28.8                | 28.8               | 0.8                         | 55                               |
| TTTA      | 29.2                | 28.3               | 1.3                         | 67                               |
| TTTC      | 22.2                | 21.8               | 1.1                         | 58                               |
| TTTG      | 25.9                | 26.2               | 0.9                         | 63                               |
| TTTT      | 22.2                | 22.8               | 0.9                         | 89                               |



## References:

20. Needleman SB & Wunsch CD (1970) A General Method Applicable to Search for Similarities in Amino Acid Sequence of 2 Proteins. *Journal of Molecular Biology* 48(3):443-453.
21. Durbin R, Eddy S, Krogh A, & Mitchison G (2006) *Biological sequence analysis* pp 92-96.
33. Dawson E, *et al.* (2001) A SNP resource for human chromosome 22: extracting dense clusters of SNPs from the genomic sequence. *Genome Res* 11(1):170-178.
